# Supplementary material for: An Accessory Protease Inhibitor to Increase the Yield and Quality of a Tumour-Targeting mAb in Nicotiana benthamiana Leaves
Source: PubMed Central journal article supplement (PMC5125672; doi:10.1371/journal.pone.0167086), 2016-11-28
Supplement: pone.0167086.s002.pdf [file pone.0167086.s002.pdf]

**S1 Table. Complement to Fig 5: H10 antibody unique peptides detected by MS/MS in heavy chain fragment samples F1 to F6.**

| H10 domains | Peptides                    | No. spectral counts |           |           |           |           |            |
|-------------|-----------------------------|---------------------|-----------|-----------|-----------|-----------|------------|
|             |                             | F1                  | F2        | F3        | F4        | F5        | F6         |
| <b>VH</b>   | EVQLVESGGGLVQPGGSLR         |                     | 2         | 1         |           | 3         | 1          |
|             | QAPGKGLEWVSAISGSGGSTYYADSVK |                     |           |           |           | 1         |            |
|             | FTISRDNISK                  |                     |           |           |           | 1         |            |
|             | FTISRDNISKNTLYLQMNSLR       |                     |           |           |           | 1         |            |
|             | DNSKNTLYLQMNSLR             | 2                   | 9         | 1         | 2         | 9         | 2          |
|             | NTRYLQMNSLR                 | 2                   | 10        | 2         | 2         | 10        | 2          |
|             | AEDTAVYYCAK                 |                     | 1         |           |           | 1         | 1          |
|             | AEDTAVYYCAKK                |                     |           |           |           | 1         |            |
|             | <b>VH Total</b>             | <b>4</b>            | <b>22</b> | <b>4</b>  | <b>4</b>  | <b>27</b> | <b>6</b>   |
| <b>CH1</b>  | ASTKGPSVFPLAPSSK            | 1                   | 6         | 1         |           | 7         |            |
|             | GPSVFPLAPSSK                | 1                   | 6         |           |           | 7         | 1          |
|             | STSGGTAALGCLVK              |                     | 2         |           |           | 3         | 1          |
|             | <b>CH1 Total</b>            | <b>2</b>            | <b>14</b> | <b>1</b>  | <b>0</b>  | <b>17</b> | <b>2</b>   |
| <b>CH2</b>  | TPEVTCVVVDVSHEDPEVK         |                     |           |           |           | 1         | 3          |
|             | FNWYVDGVEVHNAK              | 4                   | 8         | 14        | 10        | 15        | 16         |
|             | TKPREEQYNSTYR               | 2                   | 2         | 2         | 3         | 4         | 4          |
|             | EEQYNSTYR                   | 4                   | 4         | 4         | 4         | 5         | 4          |
|             | VVSVLTVLHQDWLNGK            |                     | 1         | 5         | 3         | 5         | 7          |
|             | VSNKALPAPIEK                | 3                   | 1         | 3         | 3         | 4         | 3          |
|             | ALPAPIEK                    | 12                  | 5         | 58        | 21        | 60        | 74         |
|             | ALPAPIEKTISK                | 2                   | 2         | 2         | 2         | 1         | 1          |
|             | <b>CH2 total</b>            | <b>27</b>           | <b>23</b> | <b>88</b> | <b>46</b> | <b>95</b> | <b>112</b> |

**S1 Table. Continued.**

| H10 domains | Peptides                     | No. spectral counts |              |              |              |              |              |
|-------------|------------------------------|---------------------|--------------|--------------|--------------|--------------|--------------|
|             |                              | F1                  | F2           | F3           | F4           | F5           | F6           |
| <b>CH3</b>  | AKGQPREPQVYTLPPSR            |                     |              | 2            | 1            | 2            |              |
|             | GQPREPQVYTLPPSR              | 3                   | 2            | 4            | 2            | 4            | 1            |
|             | GQPREPQVYTLPPSRDELTK         | 3                   | 2            | 10           | 9            | 13           | 6            |
|             | EPQVYTLPPSR                  | 18                  | 18           | 19           | 17           | 16           | 23           |
|             | EPQVYTLPPSRDELTK             | 18                  | 20           | 27           | 22           | 30           | 26           |
|             | NQVSLTCLVK                   | 1                   | 2            | 2            | 2            | 3            | 3            |
|             | GFYPSDIAVEWESNGQPENNYK       |                     |              |              |              |              | 4            |
|             | TTPPVLDSDGSFFLYSK            | 2                   | 4            | 9            | 6            | 7            | 12           |
|             | <b>CH3 Total</b>             | <b>45</b>           | <b>48</b>    | <b>73</b>    | <b>59</b>    | <b>75</b>    | <b>75</b>    |
|             | <b>Total spectral counts</b> | <b>78</b>           | <b>107</b>   | <b>166</b>   | <b>109</b>   | <b>214</b>   | <b>195</b>   |
|             | <b>Proportion VH/total</b>   | <b>5,1%</b>         | <b>20,6%</b> | <b>2,4%</b>  | <b>3,7%</b>  | <b>12,6%</b> | <b>3,1%</b>  |
|             | <b>CH1/total</b>             | <b>2,6%</b>         | <b>13,1%</b> | <b>0,6%</b>  | <b>0,0%</b>  | <b>7,9%</b>  | <b>1,0%</b>  |
|             | <b>CH2/total</b>             | <b>34,6%</b>        | <b>21,5%</b> | <b>53,0%</b> | <b>42,2%</b> | <b>44,4%</b> | <b>57,4%</b> |
|             | <b>CH3/total</b>             | <b>57,7%</b>        | <b>44,9%</b> | <b>44,0%</b> | <b>54,1%</b> | <b>35,0%</b> | <b>38,5%</b> |
